# Supplementary material for: Dual resistance of transgenic plants against Cymbidium mosaic virus and Odontoglossum ringspot virus
Source: PubMed Central journal article supplement (PMC6629631; doi:10.1038/s41598-019-46695-7), 2019-07-15

## Supplementary information

### **Dual resistance of transgenic plants against *Cymbidium mosaic virus* and *Odontoglossum ringspot virus***

Ting-Yu Chen<sup>1</sup>, Hsuan Pai<sup>1</sup>, Liang-Yu Hou<sup>1</sup>, Shu-Chuan Lee<sup>1</sup>, Tzu-Tung Lin<sup>1</sup>,  
Chih-Hao Chang<sup>1</sup>, Fu-Chen Hsu<sup>1</sup>, Yau-Heiu Hsu<sup>2</sup> and Na-Sheng Lin<sup>1\*</sup>

<sup>1</sup>Institute of Plant and Microbial Biology, Academia Sinica, Taiwan 11529

<sup>2</sup>Graduate Institute of Biotechnology, National Chung Hsing University, Taichung,  
Taiwan 40027

\*Corresponding author: Na-Sheng Lin

E-mail address: [nslin@sinica.edu.tw](mailto:nslin@sinica.edu.tw)

**Supplementary Table S1.** Primers used in this study. The primer size and predicted product size are shown.

| Primer         | 5'-sequence-3'                             | Length (bp) | Product length (bp)     |
|----------------|--------------------------------------------|-------------|-------------------------|
| CyCP3          | GAGAGCCCACTCCA ACTCCAGCTGC                 | 25          | 407                     |
| CyCP6          | CCCAGTTGGCGGGCGGATCGTTA                    | 23          |                         |
| CyCP9          | CACAATAAAGCTTATAACCATGGGAGAGC              | 29          | 735                     |
| CyCP10         | CCACACGCCTTATTAAGCTTGGCGTTTTTCAG           | 32          | ( <i>HindIII</i> sites) |
| 35S-1          | CGCGGATCCGCCCGGGGATCTCCTTTGCCCCAGA         | 34          | 3258                    |
| rbcSR1         | CGCGGATCCTGATGCATGTTGTCAATCAATTGGC         | 34          | ( <i>BamHI</i> sites)   |
| ORSV3          | ATGTCTTACTACTATTACAGACCCGTCTAAG            | 30          | 447                     |
| ORSV4          | TTAGGAAGAGGTCCAAGTAAGTCCAGACATCG           | 33          |                         |
| attB1-COCP     | ACAAGTTTGTACAAAAAAGCAGGCT                  | 25          | 1100                    |
| attB2-COCP     | ACCACTTTGTACAAGAAAGCTGGGT                  | 25          |                         |
| COCP1          | CATGCCATGGATGGGAGAGCCCACTCCAA              | 29          | 1170                    |
| COCP2          | CCTAACACGTGTTAGGAAGAGGTCCAAGTAA            | 31          |                         |
| CymMV RdRp-F   | TCTGGGCGATCGCATT CATGAGGTT                 | 25          | 152                     |
| CymMV RdRp-R   | CCACGTCAGGTTGAGACTTTACC                    | 23          |                         |
| ORSV RdRp-F    | GTATCAAAGGAAAAGCGGAGATGTA                  | 26          | 151                     |
| ORSV RdRp-R    | ATCAAGTCCCTTTGGAATGTATAGA                  | 25          |                         |
| Nb-actin-F     | GATGAAGATACTCACAGAAAGA                     | 22          | 200                     |
| Nb-actin-R     | GTGGTTTCATGAATGCCAGCA                      | 21          |                         |
| BaMV-P2-F      | GCGCTGCAGGGATCCATGGACCAGCCT                | 27          | 416                     |
| BaMV-P2-R      | TTCGAATTCGGATCCTTAGCATGGTGG                | 27          |                         |
| ORSV-RdRpPai-F | ATTGGCGACGAGTGGCCGTC                       | 20          | 860                     |
| ORSV-RdRpPai-R | TGCAACAAGAACGTGCGGTGA                      | 21          |                         |
| ORSV CPF       | ATCGCTCGAGATGTCTTACTACTATTACAGACCCGTCTAAG  | 40          | 467                     |
| ORSV CPR       | ATCGGGTACCTTAGGAAGAGGTCCAAGTAAGTCCAGACATCG | 43          |                         |
| Nb-actin-QF    | TACGAGCTGCCTGATGGACAA                      | 21          | 95                      |
| Nb-actin-QR    | GCTTCCATTCCGATCATTGAT                      | 21          |                         |

**Supplementary Figure S1.** ELISA analysis of CymMV and ORSV accumulation in *N. benthamiana* WT and transgenic lines. (A) Inoculated leaves (IL) at 10 dpi. (B) Systemic leaves (SL) at 26 dpi.

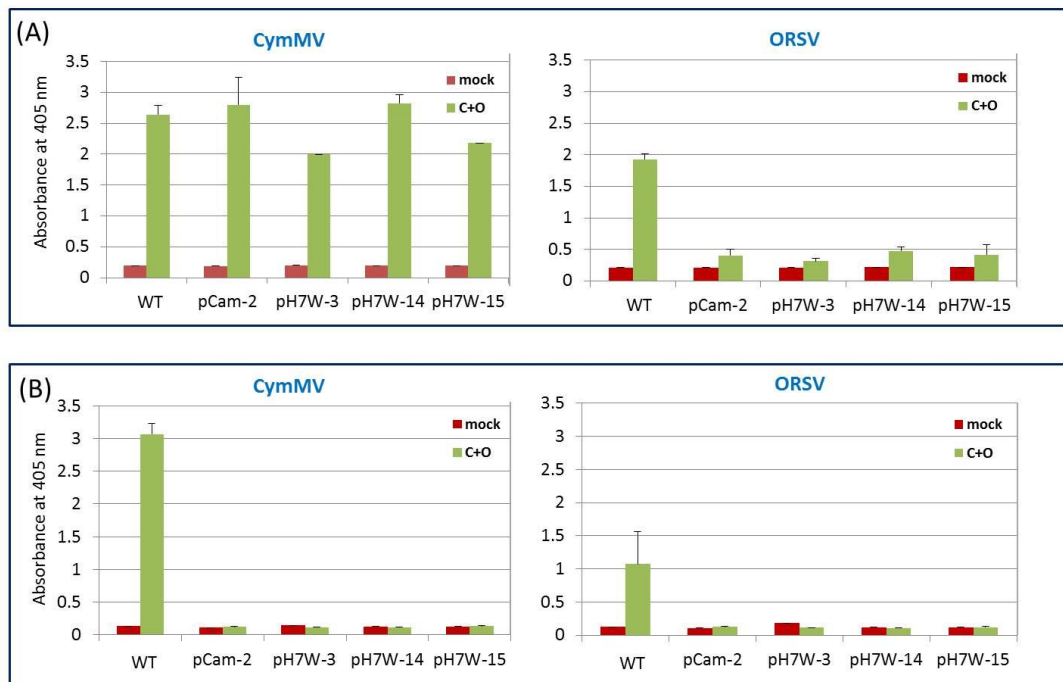

**Supplementary Figure S2.** Cell-to-cell movement of eGFP and 2x.eGFP in *N. benthamiana* leaves of WT and transgenic pH7W-COCP line 3 at 40 hr after particle bombardment. The eGFP in WT (A) and transgenic pH7W-COCP line 3 (B), 2x.eGFP in WT (C) and transgenic pH7W-COCP line 3 (D). 1: target cells showing eGFP or 2x.eGFP fluorescence. 2, 3, 4: eGFP or 2x.eGFP protein movement from target cell to the second, third or fourth cells.

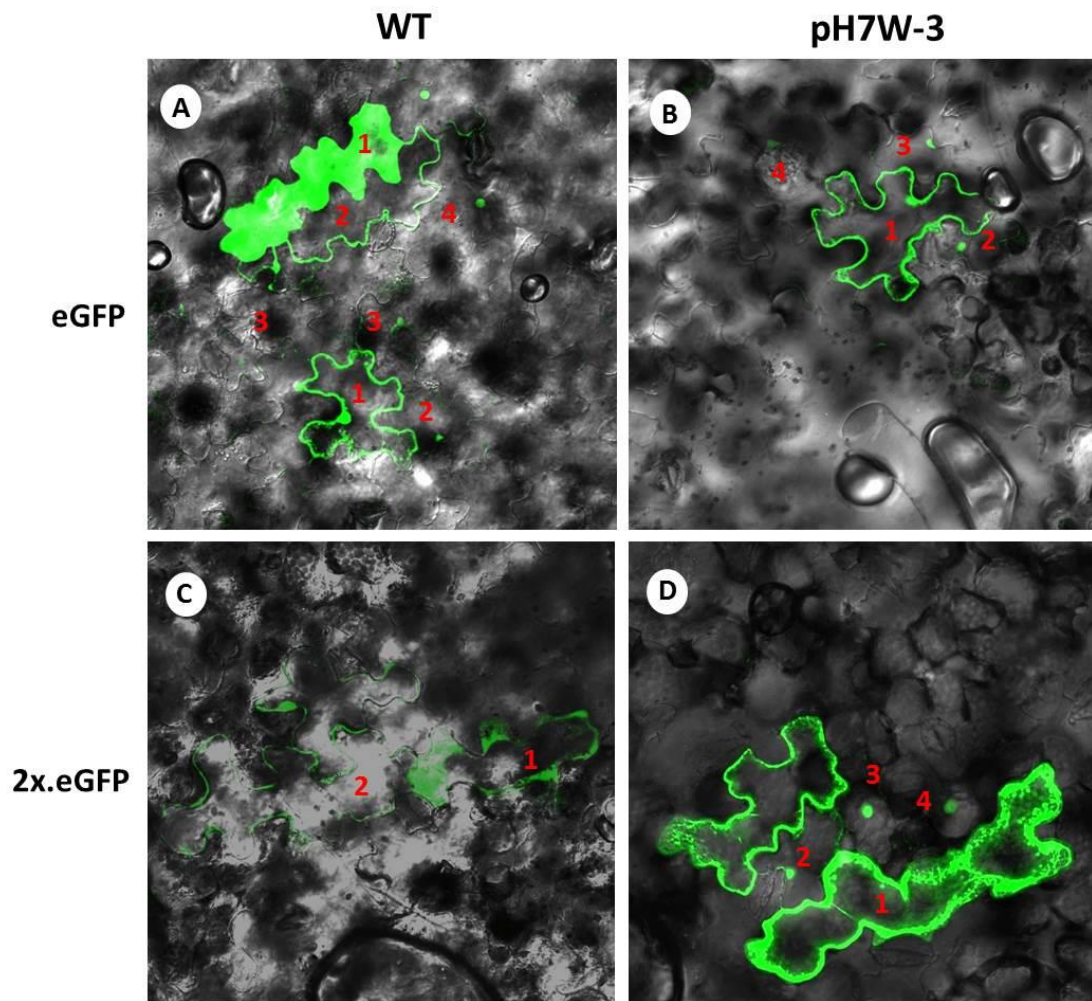

Supplement: 41598_2019_46695_MOESM1_ESM.pdf [file 41598_2019_46695_MOESM1_ESM.pdf]
